# Supplementary material for: A new polar alkaline earth–rare earth iodate: Ba2Ce(IO3)8(H2O)
Source: Royal Society of Chemistry journal article supplement (doi:10.1039/d3dt00326d), 2023-01-01
Supplement: d3dt00326d1.pdf [file d3dt00326d1.pdf]

## Supporting Information

### **A new polar alkaline earth–rare earth–iodate, $\text{Ba}_2\text{Ce}(\text{IO}_3)_8(\text{H}_2\text{O})$**

Xue-Ying Zhang,<sup>a,b</sup> Xiao-Han Zhang,<sup>a</sup> Bing-Ping Yang,<sup>\*,a,b</sup> and Jiang-Gao Mao<sup>\*,a,b</sup>

- a. State Key Laboratory of Structural Chemistry, Fujian Institute of Research on the Structure of Matter, Chinese Academy of Sciences, Fuzhou 350002, China
- b. University of Chinese Academy of Sciences, Beijing, 100049, China

E-mail: [ybp@fjirsm.ac.cn](mailto:ybp@fjirsm.ac.cn); [mjg@fjirsm.ac.cn](mailto:mjg@fjirsm.ac.cn)

## Supporting Information

**Table S1.** Crystal data and structure refinement of  $\text{Ba}_2\text{Ce}(\text{IO}_3)_8(\text{H}_2\text{O})$ .

**Table S2.** Fractional atomic coordinates ( $\times 10^4$ ), equivalent isotropic displacement parameters ( $\text{\AA}^2 \times 10^3$ ) and calculated bond valence sums (BVS) for  $\text{Ba}_2\text{Ce}(\text{IO}_3)_8(\text{H}_2\text{O})$ .

Ueq is defined as one-third of the trace of the orthogonalised Uij tensor.

**Table S3.** Bond lengths of  $\text{Ba}_2\text{Ce}(\text{IO}_3)_8(\text{H}_2\text{O})$ .

**Table S4.** Calculation of the dipole moments of the  $\text{IO}_3$  and  $\text{CeO}_9$  polyhedrons and the net dipole moment of a unit cell of  $\text{Ba}_2\text{Ce}(\text{IO}_3)_8(\text{H}_2\text{O})$ .

**Table S5.** Classification of existing cerium iodates.

**Figure S1.** Experimental and simulated powder X-ray diffraction (PXRD) patterns of  $\text{Ba}_2\text{Ce}(\text{IO}_3)_8(\text{H}_2\text{O})$ .

**Figure S2.** Energy dispersive spectroscopy analyses for  $\text{Ba}_2\text{Ce}(\text{IO}_3)_8(\text{H}_2\text{O})$ .

**Figure S3.** Coordination environment of  $\text{Ba}(1)^{2+}$  (a) and  $\text{Ba}(2)^{2+}$  (b).

**Figure S4.** Infrared spectrum of  $\text{Ba}_2\text{Ce}(\text{IO}_3)_8(\text{H}_2\text{O})$ .

**Figure S5.** Calculated band structures of  $\text{Ba}_2\text{Ce}(\text{IO}_3)_8(\text{H}_2\text{O})$ .

**Figure S6.** Photograph of  $\text{Ba}_2\text{Ce}(\text{IO}_3)_8(\text{H}_2\text{O})$  crystals.

**Figure S7.** Comparison of the dipole moment density and the SHG effect of the reported cerium iodate NLO materials.

**Figure S8.** Plot of particle size versus SHG intensity of  $\text{Ba}_2\text{Ce}(\text{IO}_3)_8(\text{H}_2\text{O})$  under laser irradiation at  $\lambda = 1064$  nm.

**Table S1.** Crystal data and structure refinement of Ba<sub>2</sub>Ce(IO<sub>3</sub>)<sub>8</sub>(H<sub>2</sub>O).

| Formula                                                       | Ba <sub>2</sub> Ce(IO <sub>3</sub> ) <sub>8</sub> (H <sub>2</sub> O)         |
|---------------------------------------------------------------|------------------------------------------------------------------------------|
| Formula weight                                                | 1832.02                                                                      |
| Temperature/K                                                 | 150.00(10)                                                                   |
| Crystal system                                                | orthorhombic                                                                 |
| Space group                                                   | <i>Pna2</i> <sub>1</sub>                                                     |
| <i>a</i> /Å                                                   | 15.5042(5)                                                                   |
| <i>b</i> /Å                                                   | 7.8841(3)                                                                    |
| <i>c</i> /Å                                                   | 19.5359(8)                                                                   |
| $\alpha$ /°                                                   | 90                                                                           |
| $\beta$ /°                                                    | 90                                                                           |
| $\gamma$ /°                                                   | 90                                                                           |
| Volume/Å <sup>3</sup>                                         | 2388.00(15)                                                                  |
| <i>Z</i>                                                      | 4                                                                            |
| $\rho_{\text{calc}}$ /cm <sup>3</sup>                         | 5.096                                                                        |
| $\mu$ /mm <sup>-1</sup>                                       | 15.587                                                                       |
| <i>F</i> (000)                                                | 3184.0                                                                       |
| Radiation                                                     | Mo K $\alpha$ ( $\lambda$ = 0.71073)                                         |
| Independent reflections                                       | 4016 [ <i>R</i> <sub>int</sub> = 0.0407, <i>R</i> <sub>sigma</sub> = 0.0359] |
| Goodness-of-fit on <i>F</i> <sup>2</sup>                      | 1.053                                                                        |
| Final <i>R</i> indexes [ <i>I</i> >= 2 $\sigma$ ( <i>I</i> )] | <i>R</i> <sub>1</sub> = 0.0246, <i>wR</i> <sub>2</sub> = 0.0528              |
| Final <i>R</i> indexes [all data]                             | <i>R</i> <sub>1</sub> = 0.0277, <i>wR</i> <sub>2</sub> = 0.0548              |
| Flack parameter                                               | 0.01(3)                                                                      |

<sup>a</sup>*R*<sub>1</sub> =  $\Sigma||F_o| - |F_c|| / \Sigma|F_o|$ ; and *wR*<sub>2</sub> =  $\{\Sigma[w(F_o^2 - F_c^2)^2] / \Sigma[w(F_o^2)^2]\}^{1/2}$

**Table S2.** Fractional atomic coordinates ( $\times 10^4$ ), equivalent isotropic displacement parameters ( $\text{\AA}^2 \times 10^3$ ) and calculated bond valence sums (BVS) for  $\text{Ba}_2\text{Ce}(\text{IO}_3)_8(\text{H}_2\text{O})$ .  $U_{\text{eq}}$  is defined as one-third of the trace of the orthogonalised  $U_{ij}$  tensor.

| Atom | x         | y          | z         | $U_{\text{eq}}$ | BVS   |
|------|-----------|------------|-----------|-----------------|-------|
| Ce1  | 5557.4(6) | 2557.6(8)  | 4462.5(5) | 5.53(18)        | 3.457 |
| Ba1  | 6710.6(6) | 2546.3(10) | 7572.3(5) | 6.5(2)          | 2.228 |
| Ba2  | 7806.0(6) | 7624.7(10) | 6280.8(5) | 7.2(2)          | 2.156 |
| I1   | 3830.1(6) | 2467.0(10) | 3057.0(5) | 6.6(2)          | 4.840 |
| I2   | 3828.2(6) | 5892.3(11) | 4556.6(5) | 5.8(2)          | 5.009 |
| I3   | 4911.3(6) | 764.1(11)  | 6184.7(5) | 7.2(2)          | 4.916 |
| I4   | 6331.3(6) | 924.0(10)  | 2828.6(5) | 7.0(2)          | 4.899 |
| I5   | 7392.2(6) | 2488.6(10) | 5729.1(5) | 6.0(2)          | 4.772 |
| I6   | 5506.8(6) | 5988.8(11) | 5984.5(5) | 6.6(2)          | 5.055 |
| I7   | 5629.1(6) | 6077.6(11) | 2934.4(5) | 7.1(2)          | 4.907 |
| I8   | 7325.5(6) | 5942.6(11) | 4301.6(5) | 6.4(2)          | 4.998 |
| O1   | 3762(7)   | 1144(14)   | 2299(6)   | 17(3)           | 1.794 |
| O2   | 4261(6)   | 4365(12)   | 2654(6)   | 12(2)           | 2.070 |
| O3   | 4833(6)   | 1608(12)   | 3431(6)   | 8(2)            | 2.047 |
| O4   | 5426(8)   | -611(12)   | 4484(7)   | 21(3)           | 1.726 |
| O5   | 4186(6)   | 3793(12)   | 4250(5)   | 8(2)            | 1.920 |
| O6   | 3147(7)   | 5158(12)   | 5240(5)   | 12(2)           | 2.251 |
| O7   | 3035(7)   | 6258(13)   | 3902(5)   | 10(2)           | 2.201 |
| O8   | 4600(6)   | 1711(14)   | 5367(5)   | 12(3)           | 1.969 |
| O9   | 3837(6)   | 375(12)    | 6516(6)   | 13(3)           | 1.866 |
| O10  | 5189(7)   | 2610(11)   | 6699(6)   | 11(2)           | 1.824 |
| O11  | 7445(6)   | 648(12)    | 2554(6)   | 9(2)            | 2.063 |
| O12  | 6543(6)   | 1502(13)   | 3723(5)   | 12(2)           | 2.106 |
| O13  | 6196(7)   | 2982(12)   | 2434(5)   | 12(2)           | 1.975 |
| O14  | 7488(7)   | 1113(12)   | 6466(5)   | 7(2)            | 2.235 |
| O15  | 6929(6)   | 4303(11)   | 6187(5)   | 6(2)            | 1.742 |
| O16  | 6383(6)   | 1538(12)   | 5398(5)   | 8(2)            | 1.899 |
| O17  | 4534(7)   | 7236(12)   | 5945(6)   | 10(2)           | 1.998 |
| O18  | 5336(7)   | 4894(12)   | 5176(5)   | 9(2)            | 2.080 |
| O19  | 6247(7)   | 7570(12)   | 5660(6)   | 13(3)           | 2.011 |
| O20  | 5807(7)   | 4895(13)   | 3727(6)   | 12(2)           | 2.003 |
| O21  | 6581(7)   | 7407(12)   | 2998(6)   | 12(2)           | 1.930 |
| O22  | 4856(7)   | 7570(12)   | 3294(6)   | 11(3)           | 1.877 |
| O23  | 6949(6)   | 3931(11)   | 4654(5)   | 8(2)            | 1.944 |
| O24  | 8144(7)   | 6287(12)   | 4954(6)   | 12(2)           | 1.853 |
| O25  | 7971(6)   | 5169(12)   | 3603(5)   | 10(2)           | 1.988 |

**Table S3.** Bond lengths of Ba<sub>2</sub>Ce(IO<sub>3</sub>)<sub>8</sub>(H<sub>2</sub>O).

| <b>Bond</b>          | <b>Length/Å</b> | <b>Bond</b> | <b>Length/Å</b> |
|----------------------|-----------------|-------------|-----------------|
| Ce1-O3               | 2.426(10)       | Ba2-O19     | 2.704(11)       |
| Ce1-O4               | 2.507(10)       | Ba2-O24     | 2.846(11)       |
| Ce1-O5               | 2.375(10)       | I1-O1       | 1.815(10)       |
| Ce1-O8               | 2.402(10)       | I1-O2       | 1.818(9)        |
| Ce1-O12              | 2.262(10)       | I1-O3       | 1.846(10)       |
| Ce1-O16              | 2.371(11)       | I2-O5       | 1.845(9)        |
| Ce1-O18              | 2.335(10)       | I2-O6       | 1.798(10)       |
| Ce1-O20              | 2.369(11)       | I2-O7       | 1.797(10)       |
| Ce1-O23              | 2.443(10)       | I3-O8       | 1.829(10)       |
| Ba1-O1 <sup>2</sup>  | 3.048(11)       | I3-O9       | 1.814(10)       |
| Ba1-O2 <sup>1</sup>  | 2.867(10)       | I3-O10      | 1.820(10)       |
| Ba1-O7 <sup>1</sup>  | 2.791(11)       | I4-O11      | 1.822(10)       |
| Ba1-O10              | 2.912(11)       | I4-O12      | 1.836(10)       |
| Ba1-O11 <sup>3</sup> | 2.774(10)       | I4-O13      | 1.809(10)       |
| Ba1-O14              | 2.720(10)       | I5-O14      | 1.809(10)       |
| Ba1-O15              | 3.059(10)       | I5-O15      | 1.834(9)        |
| Ba1-O21 <sup>4</sup> | 2.779(11)       | I5-O16      | 1.852(10)       |
| Ba1-O22 <sup>1</sup> | 2.809(11)       | I5-O23      | 2.485(10)       |
| Ba1-O25 <sup>4</sup> | 2.794(10)       | I6-O17      | 1.803(10)       |
| Ba2-O1 <sup>1</sup>  | 3.287(11)       | I6-O18      | 1.820(10)       |
| Ba2-O6 <sup>5</sup>  | 2.733(10)       | I6-O19      | 1.810(10)       |
| Ba2-O9 <sup>6</sup>  | 2.891(10)       | I7-O20      | 1.829(11)       |
| Ba2-O11 <sup>3</sup> | 2.960(11)       | I7-O21      | 1.814(10)       |
| Ba2-O13 <sup>3</sup> | 2.747(10)       | I7-O22      | 1.821(10)       |
| Ba2-O14 <sup>7</sup> | 2.817(9)        | I8-O23      | 1.825(9)        |
| Ba2-O15              | 2.957(9)        | I8-O24      | 1.819(11)       |
| Ba2-O17 <sup>5</sup> | 2.760(10)       | I8-O25      | 1.799(10)       |

Symmetry transformations used to generate equivalent atoms: <sup>1</sup>1-X,1-Y,1/2+Z; <sup>2</sup>1-X, -Y,1/2+Z;  
<sup>3</sup>3/2-X,1/2+Y,1/2+Z; <sup>4</sup>3/2-X, -1/2+Y,1/2+Z; <sup>5</sup>1/2+X,3/2-Y, +Z; <sup>6</sup>1/2+X,1/2-Y, +Z; <sup>7</sup>+X,1+Y, +Z.

**Table S4.** Calculation of the dipole moments of the IO<sub>3</sub> and CeO<sub>9</sub> polyhedrons and the net dipole moment of a unit cell of Ba<sub>2</sub>Ce(IO<sub>3</sub>)<sub>8</sub>(H<sub>2</sub>O).

| Ba <sub>2</sub> Ce(IO <sub>3</sub> ) <sub>8</sub> (H <sub>2</sub> O) |                                          |            |            |       |
|----------------------------------------------------------------------|------------------------------------------|------------|------------|-------|
| Polar unit (a unit cell)                                             | Dipole moment (D)                        |            |            |       |
|                                                                      | <i>x</i>                                 | <i>y</i>   | <i>z</i>   | total |
| I(1)O <sub>3</sub>                                                   | 2×(±10.91)                               | 2×(±1.05)  | 4×(-8.50)  | 13.87 |
| I(2)O <sub>3</sub>                                                   | 2×(±10.39)                               | 2×(±10.55) | 4×(-2.89)  | 15.09 |
| I(3)O <sub>3</sub>                                                   | 2×(±9.21)                                | 2×(±9.99)  | 4×(0.46)   | 13.59 |
| I(4)O <sub>3</sub>                                                   | 2×(±10.00)                               | 2×(±10.30) | 4×(2.05)   | 14.50 |
| I(5)O <sub>3</sub>                                                   | 2×(±11.07)                               | 2×(±2.30)  | 4×(9.48)   | 14.75 |
| I(6)O <sub>3</sub>                                                   | 2×(±3.78)                                | 2×(±8.24)  | 4×(-13.36) | 16.14 |
| I(7)O <sub>3</sub>                                                   | 2×(±3.19)                                | 2×(±7.42)  | 4×(13.26)  | 15.53 |
| I(8)O <sub>3</sub>                                                   | 2×(±9.59)                                | 2×(±10.71) | 4×(2.99)   | 14.68 |
| CeO <sub>9</sub>                                                     | 2×(±1.20)                                | 2×(±1.42)  | 4×(-0.95)  | 2.09  |
| Net dipole moment                                                    | 0                                        | 0          | 10.2020    | /     |
| Net dipole moment (IO <sub>3</sub> )                                 | 0                                        | 0          | 14.0202    | /     |
| Cell Volume                                                          | 2388.00 Å <sup>3</sup>                   |            |            |       |
| Dipole moment density                                                | 10.2020/2388.00=0.0043 D Å <sup>-3</sup> |            |            |       |
| Dipole moment density (IO <sub>3</sub> )                             | 14.0202/2388.00=0.0059 D Å <sup>-3</sup> |            |            |       |

**Table S5.** Classification of existing cerium iodates.

|                                           | Compound                                                              | Space group                                     | SHG                        | Band gap | Ref |
|-------------------------------------------|-----------------------------------------------------------------------|-------------------------------------------------|----------------------------|----------|-----|
| Ce(III)                                   | Ce(IO <sub>3</sub> ) <sub>3</sub>                                     | <i>P2<sub>1</sub>/n</i>                         | N/A                        | N/A      | 1   |
|                                           | Ce(VO <sub>3</sub> ) <sub>2</sub> (IO <sub>3</sub> )                  | <i>Pbcm</i>                                     | N/A                        | 1.64 eV  | 2   |
|                                           | NaCe(IO <sub>3</sub> ) <sub>4</sub>                                   | <i>Cc</i>                                       | 50 ×<br>α-SiO <sub>2</sub> | 2.97 eV  | 3   |
|                                           | Ce(MoO <sub>2</sub> )(IO <sub>3</sub> ) <sub>4</sub> (OH)             | <i>P2<sub>1</sub></i>                           | negligible                 | 2.41 eV  | 4   |
|                                           | Ce <sub>3</sub> Pb <sub>3</sub> (IO <sub>3</sub> ) <sub>13</sub> O    | <i>R3cH</i>                                     | very weak                  | 2.4 eV   | 5   |
|                                           | Ce <sub>2</sub> I <sub>6</sub> O <sub>18</sub>                        | <i>P2<sub>1</sub></i>                           | 9 × KDP                    | 2.5 eV   | 6   |
| Ce(IV)                                    | Ce(IO <sub>3</sub> ) <sub>4</sub> ·H <sub>2</sub> O                   | <i>P2<sub>1</sub>/n</i>                         | N/A                        | N/A      | 7   |
|                                           | Ce(IO <sub>3</sub> ) <sub>4</sub>                                     | <i>P4<sub>2</sub>/n</i>                         | N/A                        | N/A      | 8   |
|                                           | Ce <sub>2</sub> (IO <sub>3</sub> ) <sub>8</sub> (H <sub>2</sub> O)    | <i>R3c</i>                                      | 1.3 × KDP                  | 2.43 eV  | 9   |
|                                           | Ce(IO <sub>3</sub> ) <sub>2</sub> F <sub>2</sub> ·H <sub>2</sub> O    | <i>Ima2</i>                                     | 3 × KDP                    | 2.6 eV   | 10  |
|                                           | Ce <sub>2</sub> (IO <sub>3</sub> ) <sub>6</sub> (O)                   | <i>Pnma</i>                                     | N/A                        | N/A      | 11  |
|                                           | K <sub>8</sub> Ce <sub>2</sub> I <sub>18</sub> O <sub>53</sub>        | <i>C2/c</i>                                     | N/A                        | 2.34 eV  | 12  |
|                                           | Ce(IO <sub>3</sub> ) <sub>2</sub> (SO <sub>4</sub> )                  | <i>P2<sub>1</sub>2<sub>1</sub>2<sub>1</sub></i> | 3.5 × KDP                  | 2.42 eV  | 13  |
|                                           | Ce(IO <sub>3</sub> ) <sub>2</sub> F <sub>2</sub>                      | <i>Pna2<sub>1</sub></i>                         | 5.5 × KDP                  | 2.70 eV  | 14  |
|                                           | CaCe(IO <sub>3</sub> ) <sub>3</sub> (IO <sub>3</sub> F)F              | <i>Pna2<sub>1</sub></i>                         | 5 × KDP                    | 2.72 eV  | 15  |
| intermediate-valent<br>Ce(III)/Ce<br>(IV) | La <sub>0.3</sub> Ce <sub>9</sub> (IO <sub>3</sub> ) <sub>36</sub>    | <i>R3c</i>                                      | 1.1 × KDP                  | 2.30 eV  | 16  |
|                                           | K <sub>3</sub> Ce <sub>9</sub> (IO <sub>3</sub> ) <sub>36</sub>       | <i>R3c</i>                                      | 0.4 × KDP                  | 2.30 eV  | 16  |
|                                           | Ce <sub>2</sub> (IO <sub>3</sub> ) <sub>6</sub> (OH <sub>0.44</sub> ) | <i>Pnma</i>                                     | N/A                        | N/A      | 11  |

N/A: stands for not applicable or not available

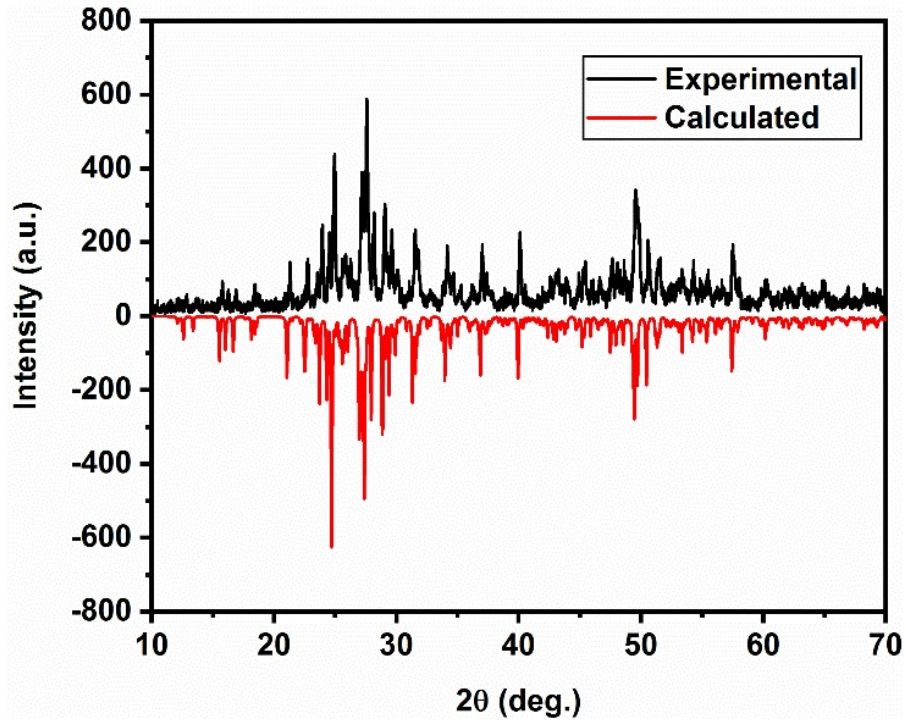

**Figure S1.** Experimental and simulated powder X-ray diffraction (PXRD) patterns of  $\text{Ba}_2\text{Ce}(\text{IO}_3)_8(\text{H}_2\text{O})$ .

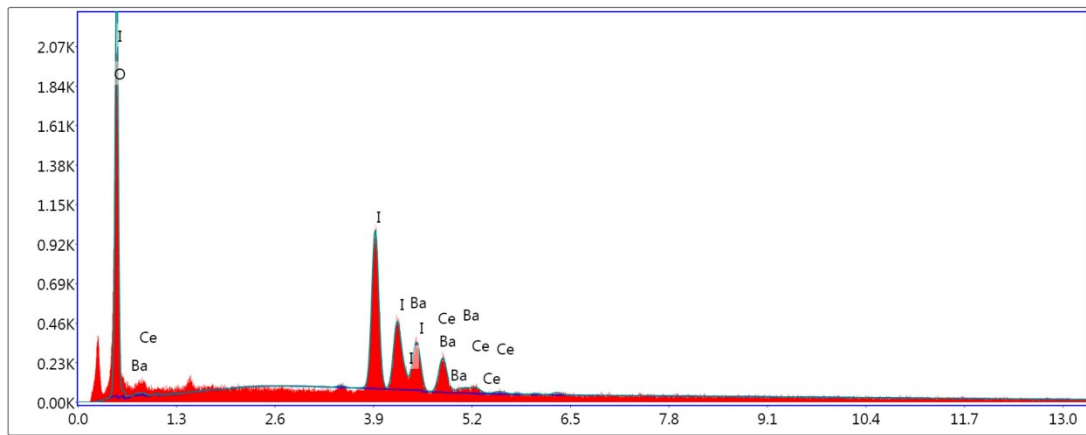

Lsec: 10.8 0 Cnts 0.000 keV Det: Octane Plus Det

**Figure S2.** Energy dispersive spectroscopy analyses for  $\text{Ba}_2\text{Ce}(\text{IO}_3)_8(\text{H}_2\text{O})$ .



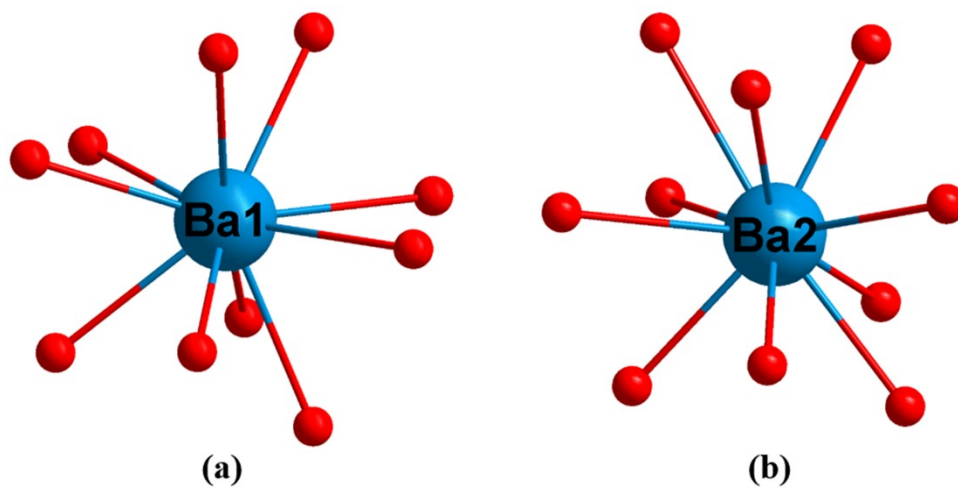

**Figure S3.** Coordination environment of Ba(1)<sup>2+</sup> (a) and Ba(2)<sup>2+</sup> (b).

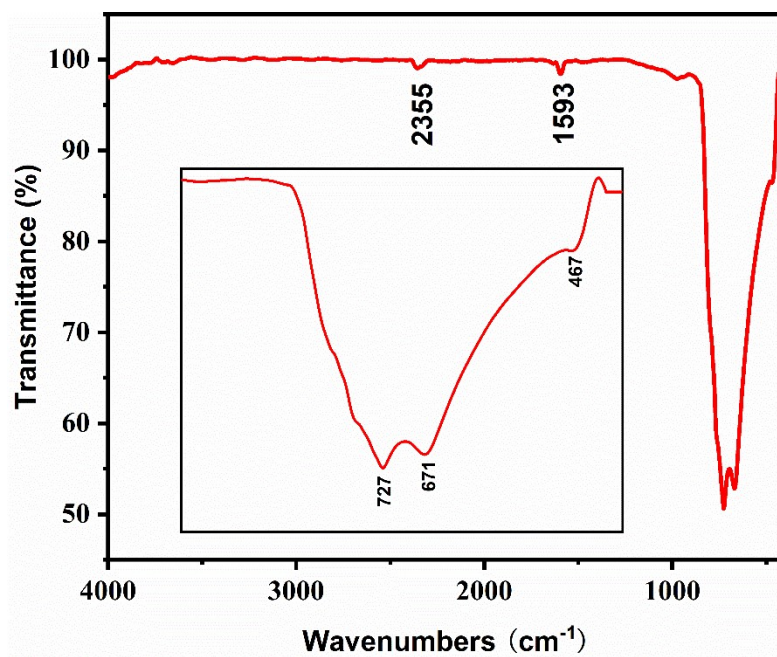

**Figure S4.** Infrared spectrum of Ba<sub>2</sub>Ce(IO<sub>3</sub>)<sub>8</sub>(H<sub>2</sub>O).

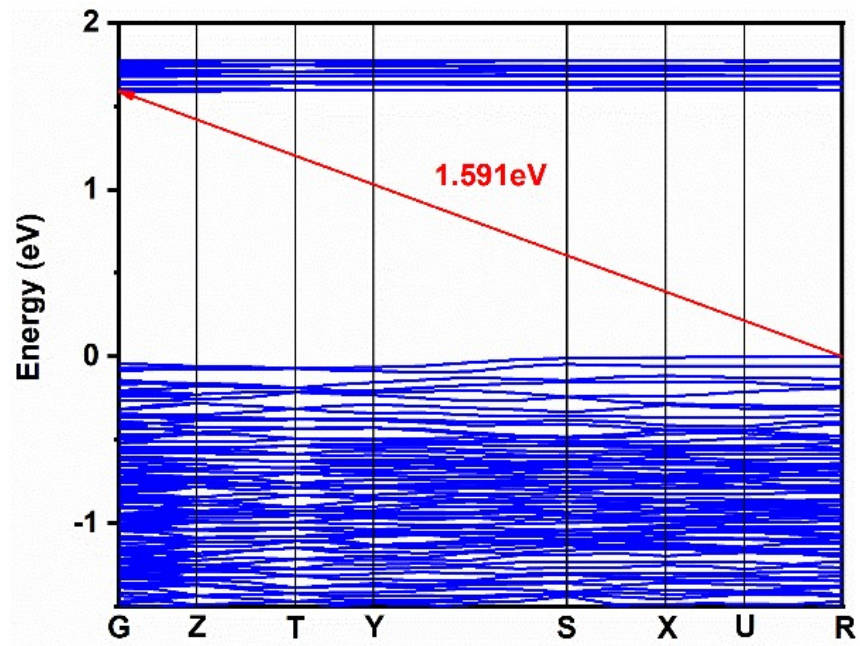

Figure S5. Calculated band structures of  $\text{Ba}_2\text{Ce}(\text{IO}_3)_8(\text{H}_2\text{O})$ .

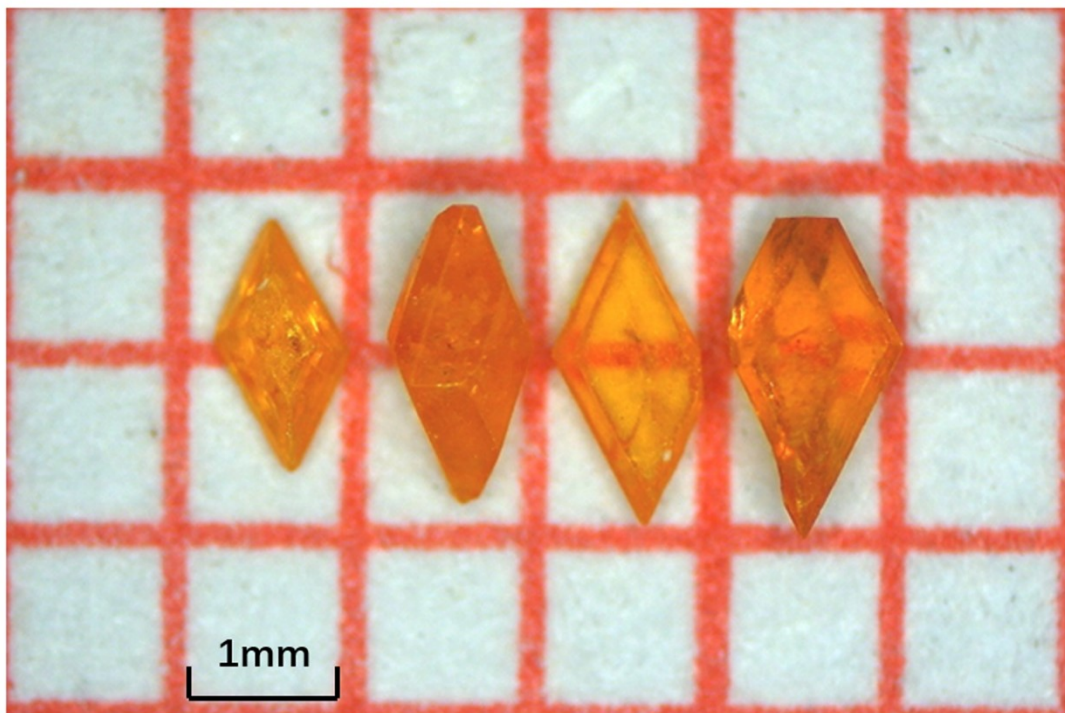

Figure S6. Photograph of  $\text{Ba}_2\text{Ce}(\text{IO}_3)_8(\text{H}_2\text{O})$  crystals.

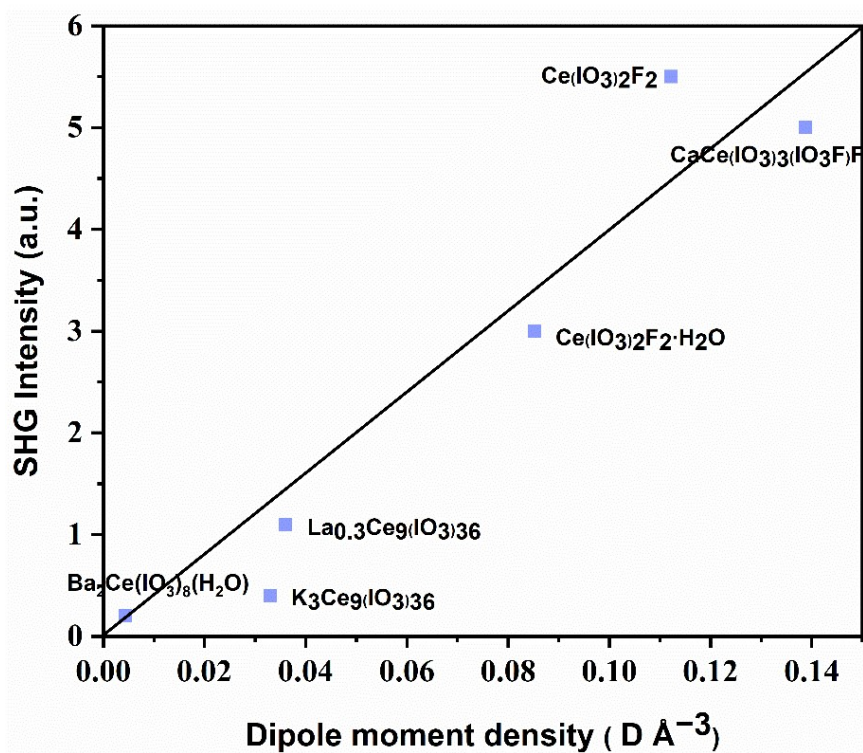

Figure S7. Comparison of the dipole moment density and the SHG effect of the reported cerium iodate NLO materials.

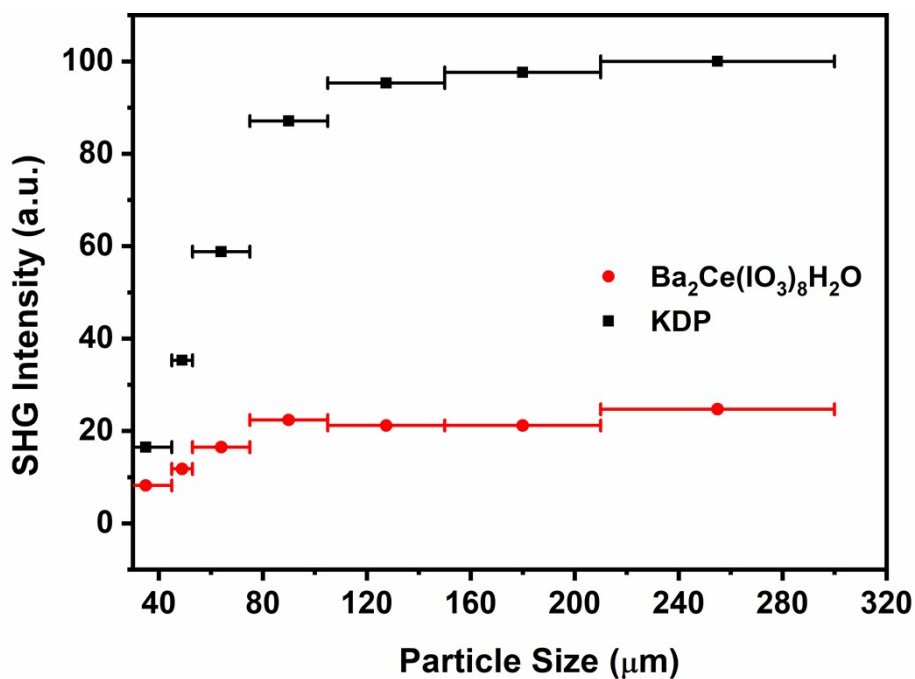

Figure S8. Plot of particle size versus SHG intensity of  $\text{Ba}_2\text{Ce}(\text{IO}_3)_8(\text{H}_2\text{O})$  under laser irradiation at  $\lambda = 1064 \text{ nm}$ .

## References

1. X. A. Chen, L. Zhang, X. A. Chang, H. G. Zang and W. Q. Xiao, *Acta Crystallogr., Sect. C: Cryst. Struct. Commun.*, 2005, **61**, 161-162.
2. T. Eaton, J. Lin, J. N. Cross, J. T. Stritzinger and T. E. Albrecht-Schmitt, *Chem. Commun.*, 2014, **50**, 3668-3670.
3. S.-J. Oh, Hyung-Gu Kim, H. Jo, T. G. Lim, J. S. Yoo and K. M. Ok, *Inorg. Chem.*, 2017, **56**, 6973-6981.
4. J. Lin, Q. Liu, Z. Yue, K. Diefenbach, L. Cheng, Y. Lin and J. Q. Wang, *Dalton Trans*, 2019, **48**, 4823-4829.
5. T. Hu, L. Qin, F. Kong, Y. Zhou and J. G. Mao, *Inorg. Chem.*, 2009, **48**, 2193-2199.
6. L. Xiao, Z. B. Cao, J. Y. Yao, Z. S. Lin and Z. G. Hu, *J. Mater. Chem. C*, 2017, **5**, 2130-2134.
7. J. A. Ibers and D. T. Cromer, *Acta Crystallogr*, 1958, **11**, 794-798.
8. D. T. Cromer and A. C. Larson, *Acta Crystallogr*, 1956, **9**, 1015-1018.
9. Y. Wang, T. Duan, Z. Weng, J. Ling, X. Yin, L. Chen, D. Sheng, J. Diwu, Z. Chai, N. Liu and S. Wang, *Inorg. Chem.*, 2017, **56**, 13041-13050.
10. T. Abudouwufu, M. Zhang, S. C. Cheng, Z. H. Yang and S. L. Pan, *Chemistry*, 2019, **25**, 1221-1226.
11. R. E. Sykora, L. Deakin, A. Mar, S. Skanthakumar, L. Soderholm and T. E. Albrecht-Schmitt, *Chem. Mater.*, 2004, **16**, 1343-1349.
12. R. Wu, X. Jiang, M. Xia, L. Liu, X. Wang, Z. Lin and C. Chen, *Dalton Trans*, 2017, **46**, 4170-4173.
13. T. H. Wu, X. X. Jiang, Y. R. Zhang, Z. J. Wang, H. Y. Sha, C. Wu, Z. S. Lin, Z. P. Huang, X. F. Long, M. G. Humphrey and C. Zhang, *Chem. Mater.*, 2021, **33**, 9317-9325.
14. X. H. Zhang, B. P. Yang, C. L. Hu, J. Chen, Q. M. Huang and J. G. Mao, *Chem. Mater.*, 2021, **33**, 2894-2900.
15. N. Ma, C.-L. Hu, J. Chen, Z. Fang, Y. Huang, B.-X. Li and J.-G. Mao, *Inorg. Chem. Front.*, 2022, **9**, 5478-5485.
16. H. X. Tang, C. Zhuo, Y. X. Zhang, Q. R. Shui, R. B. Fu, Z. J. Ma and X. T. Wu, *Dalton Trans*, 2020, **49**, 3672-3675.
